# Supplementary material
Source: HighWire-hosted journal article supplement (https://bmjopen.bmj.com/content/7/8/e014508)
Supplement: inline-supplementary-material-1 [file inline-supplementary-material-1.pdf]

## Appendix 1

| ICD-10 chapters according to year |                                                                                                     | 2007          |                | 2008          |                | 2009          |                | 2010          |                | 2011          |                | 2012          |                | 2013          |                | 2014          |                | Index      |
|-----------------------------------|-----------------------------------------------------------------------------------------------------|---------------|----------------|---------------|----------------|---------------|----------------|---------------|----------------|---------------|----------------|---------------|----------------|---------------|----------------|---------------|----------------|------------|
|                                   |                                                                                                     | N             | (%)            |            |
| I.                                | Certain infectious and parasitic diseases                                                           | 159           | (1.1)          | 161           | (1.1)          | 214           | (1.3)          | 249           | (1.4)          | 268           | (1.4)          | 324           | (1.6)          | 365           | (1.7)          | 311           | (1.3)          | 196        |
| II.                               | Neoplasms                                                                                           | 81            | (0.6)          | 87            | (0.6)          | 113           | (0.7)          | 100           | (0.6)          | 111           | (0.6)          | 120           | (0.6)          | 90            | (0.4)          | 75            | (0.3)          | 92         |
| III.                              | Diseases of the blood and blood-forming organs and certain disorders involving the immune mechanism | 41            | (0.3)          | 46            | (0.3)          | 62            | (0.4)          | 68            | (0.4)          | 63            | (0.3)          | 85            | (0.4)          | 97            | (0.4)          | 78            | (0.3)          | 190        |
| IV.                               | Endocrine, nutritional and metabolic diseases                                                       | 362           | (2.6)          | 376           | (2.5)          | 456           | (2.8)          | 441           | (2.4)          | 413           | (2.1)          | 439           | (2.1)          | 477           | (2.2)          | 480           | (2.1)          | 132        |
| V.                                | Mental and behavioural disorders                                                                    | 915           | (6.5)          | 856           | (5.6)          | 915           | (5.7)          | 955           | (5.3)          | 984           | (5.0)          | 1 109         | (5.4)          | 1 181         | (5.5)          | 1 144         | (4.9)          | 126        |
| VI.                               | Diseases of the nervous system                                                                      | 510           | (3.6)          | 547           | (3.6)          | 656           | (4.1)          | 657           | (3.6)          | 657           | (3.3)          | 786           | (3.8)          | 883           | (4.1)          | 735           | (3.1)          | 144        |
| VII.                              | Diseases of the eye and adnexa                                                                      | 3             | (0.0)          | 6             | (0.0)          | 4             | (0.0)          | 10            | (0.1)          | 4             | (0.0)          | 9             | (0.0)          | 11            | (0.1)          | 18            | (0.1)          | 600        |
| VIII.                             | Diseases of the ear and mastoid process                                                             | 33            | (0.2)          | 25            | (0.2)          | 53            | (0.3)          | 34            | (0.2)          | 51            | (0.3)          | 45            | (0.2)          | 68            | (0.3)          | 66            | (0.3)          | 200        |
| IX.                               | Diseases of the circulatory system                                                                  | 1 377         | (9.8)          | 1 534         | (10.1)         | 1 531         | (9.5)          | 2 051         | (11.3)         | 2 267         | (11.5)         | 2 320         | (11.2)         | 2 333         | (10.8)         | 2 349         | (10.1)         | 170        |
| X.                                | Diseases of the respiratory system                                                                  | 842           | (6.0)          | 886           | (5.8)          | 988           | (6.1)          | 1 272         | (7.0)          | 1 397         | (7.1)          | 1 507         | (7.3)          | 1 631         | (7.6)          | 1 422         | (6.1)          | 168        |
| XI.                               | Diseases of the digestive system                                                                    | 399           | (2.8)          | 452           | (3.0)          | 427           | (2.7)          | 599           | (3.3)          | 656           | (3.3)          | 720           | (3.5)          | 833           | (3.9)          | 762           | (3.3)          | 190        |
| XII.                              | Diseases of the skin and subcutaneous tissue                                                        | 20            | (0.1)          | 20            | (0.1)          | 20            | (0.1)          | 29            | (0.2)          | 42            | (0.2)          | 32            | (0.2)          | 48            | (0.2)          | 46            | (0.2)          | 230        |
| XIII.                             | Diseases of the musculoskeletal system and connective tissue                                        | 206           | (1.5)          | 232           | (1.5)          | 226           | (1.4)          | 265           | (1.5)          | 331           | (1.7)          | 350           | (1.7)          | 334           | (1.5)          | 450           | (1.9)          | 218        |
| XIV.                              | Diseases of the genitourinary system                                                                | 186           | (1.3)          | 193           | (1.3)          | 213           | (1.3)          | 239           | (1.3)          | 321           | (1.6)          | 315           | (1.5)          | 354           | (1.6)          | 393           | (1.7)          | 212        |
| XV.                               | Pregnancy, childbirth and the puerperium                                                            | 69            | (0.5)          | 76            | (0.5)          | 80            | (0.5)          | 92            | (0.5)          | 89            | (0.5)          | 73            | (0.4)          | 73            | (0.3)          | 99            | (0.4)          | 144        |
| XVI.                              | Certain conditions originating in the perinatal period                                              | 6             | (0.0)          | 7             | (0.0)          | 5             | (0.0)          | 5             | (0.0)          | 6             | (0.0)          | 10            | (0.0)          | 6             | (0.0)          | 7             | (0.0)          | 116        |
| XVII.                             | Congenital malformations, deformations and chromosomal abnormalities                                | 8             | (0.1)          | 4             | (0.0)          | 13            | (0.1)          | 6             | (0.0)          | 14            | (0.1)          | 9             | (0.0)          | 10            | (0.0)          | 8             | (0.0)          | 100        |
| XVIII.                            | Symptoms, signs and abnormal clinical and laboratory findings, not elsewhere classified             | 2 113         | (15.1)         | 2 412         | (15.9)         | 2 503         | (15.6)         | 2 809         | (15.5)         | 2 965         | (15.0)         | 3 042         | (14.7)         | 3 583         | (16.6)         | 6 550         | (28.0)         | 310        |
| XIX.                              | Injury, poisoning and certain other consequences of external causes                                 | 4 777         | (34.0)         | 5 089         | (33.5)         | 5 291         | (32.9)         | 5 554         | (30.6)         | 5 967         | (30.3)         | 5 909         | (28.6)         | 5 954         | (27.6)         | 6 137         | (26.3)         | 128        |
| XXI.                              | Factors influencing health status and contact with health services                                  | 1 916         | (13.7)         | 2 171         | (14.3)         | 2 267         | (14.1)         | 2 700         | (14.9)         | 3 082         | (15.6)         | 3 408         | (16.5)         | 3 167         | (14.7)         | 2 235         | (9.6)          | 116        |
|                                   | Codes for special purposes                                                                          | 8             | (0.1)          | 9             | (0.1)          | 35            | (0.2)          | 27            | (0.1)          | 22            | (0.1)          | 46            | (0.2)          | 68            | (0.3)          | 4             | (0.0)          | 50         |
|                                   | <b>Total</b>                                                                                        | <b>14 031</b> | <b>(100.0)</b> | <b>15 189</b> | <b>(100.0)</b> | <b>16 072</b> | <b>(100.0)</b> | <b>18 162</b> | <b>(100.0)</b> | <b>19 710</b> | <b>(100.0)</b> | <b>20 658</b> | <b>(100.0)</b> | <b>21 566</b> | <b>(100.0)</b> | <b>23 369</b> | <b>(100.0)</b> | <b>167</b> |

Diagnoses according to ICD-10 chapters among 148 757 prehospital patients in the North Denmark Region in 2007-2014. Numbers (N) and percentages (%), index=100 in 2007.
