# Supplementary material
Source: HighWire-hosted journal article supplement (https://bmjopen.bmj.com/content/7/8/e014508)
Supplement: inline-supplementary-material-2 [file inline-supplementary-material-2.pdf]

Appendix 2

| Year         | 1-day mortality |                        |             |                           | 30-day mortality |                        |             |                           |
|--------------|-----------------|------------------------|-------------|---------------------------|------------------|------------------------|-------------|---------------------------|
|              | RR              | <i>Crude</i><br>95% CI | RR          | <i>Adjusted</i><br>95% CI | RR               | <i>Crude</i><br>95% CI | RR          | <i>Adjusted</i><br>95% CI |
| 2007         | 1 (ref)         |                        | 1 (ref)     |                           | 1 (ref)          |                        | 1 (ref)     |                           |
| 2008         | 0.98            | (0.83 to 1.14)         | 0.96        | (0.82 to 1.12)            | 0.99             | (0.89 to 1.11)         | 0.97        | (0.87 to 1.08)            |
| 2009         | 0.85            | (0.72 to 1.00)         | 0.84        | (0.71 to 0.99)            | 0.99             | (0.88 to 1.10)         | 0.97        | (0.87 to 1.08)            |
| 2010         | 0.92            | (0.79 to 1.08)         | 0.87        | (0.74 to 1.01)            | 1.05             | (0.95 to 1.17)         | 0.98        | (0.88 to 1.09)            |
| 2011         | 0.72            | (0.61 to 0.86)         | 0.70        | (0.59 to 0.83)            | 0.92             | (0.82 to 1.03)         | 0.88        | (0.79 to 0.99)            |
| 2012         | 0.68            | (0.57 to 0.81)         | 0.66        | (0.55 to 0.78)            | 0.88             | (0.79 to 0.99)         | 0.85        | (0.76 to 0.94)            |
| 2013         | 0.57            | (0.47 to 0.68)         | 0.54        | (0.45 to 0.64)            | 0.81             | (0.72 to 0.90)         | 0.75        | (0.67 to 0.84)            |
| 2014         | 0.45            | (0.37 to 0.55)         | 0.42        | (0.35 to 0.51)            | 0.78             | (0.70 to 0.88)         | 0.72        | (0.65 to 0.81)            |
| <b>Trend</b> | <b>0.90</b>     | <b>(0.88 to 0.92)</b>  | <b>0.89</b> | <b>(0.88 to 0.91)</b>     | <b>0.96</b>      | <b>(0.95 to 0.97)</b>  | <b>0.95</b> | <b>(0.94 to 0.97)</b>     |

Analyses of overall mortality including only the first ambulance run of each patient (N=97 245).
